Correction

## Correction: The receptor for urokinase-plasminogen activator (uPAR) controls plasticity of cancer cell movement in mesenchymal and amoeboid migration style

Francesca Margheri<sup>1,\*</sup>, Cristina Luciani<sup>1,\*</sup>, Maria Letizia Taddei<sup>1</sup>, Elisa Giannoni<sup>1</sup>, Anna Laurenzana<sup>1</sup>, Alessio Biagioni<sup>1</sup>, Anastasia Chillà<sup>1</sup>, Paola Chiarugi<sup>1</sup>, Gabriella Fibbi<sup>1</sup> and Mario Del Rosso<sup>1</sup>

<sup>1</sup>Department of Experimental and Clinical Biomedical Sciences, University of FlorenceIstituto Toscano Tumori

\*These authors have contributed equally to this work

**Published:**

**Copyright:** © 2021 Margheri et al. This is an open access article distributed under the terms of the [Creative Commons Attribution License](#) (CC BY 3.0), which permits unrestricted use, distribution, and reproduction in any medium, provided the original author and source are credited.

**This article has been corrected:** In Figure 6A, the first lanes were cut in all the genes illustrated because the authors decided not to show another tested cell line that was originally intended for this paper. This splice has now been clearly marked. In Figure 6C, all three images in the bottom row of the A375M6 section contain accidental overlaps of the three images in the 2nd row. The corrected Figure 6, produced using the original data, is shown below. The authors declare that these corrections do not change the results or conclusions of this paper.

Original article: Oncotarget. 2014; 5:1538–1553. <https://doi.org/10.18632/oncotarget.1754>

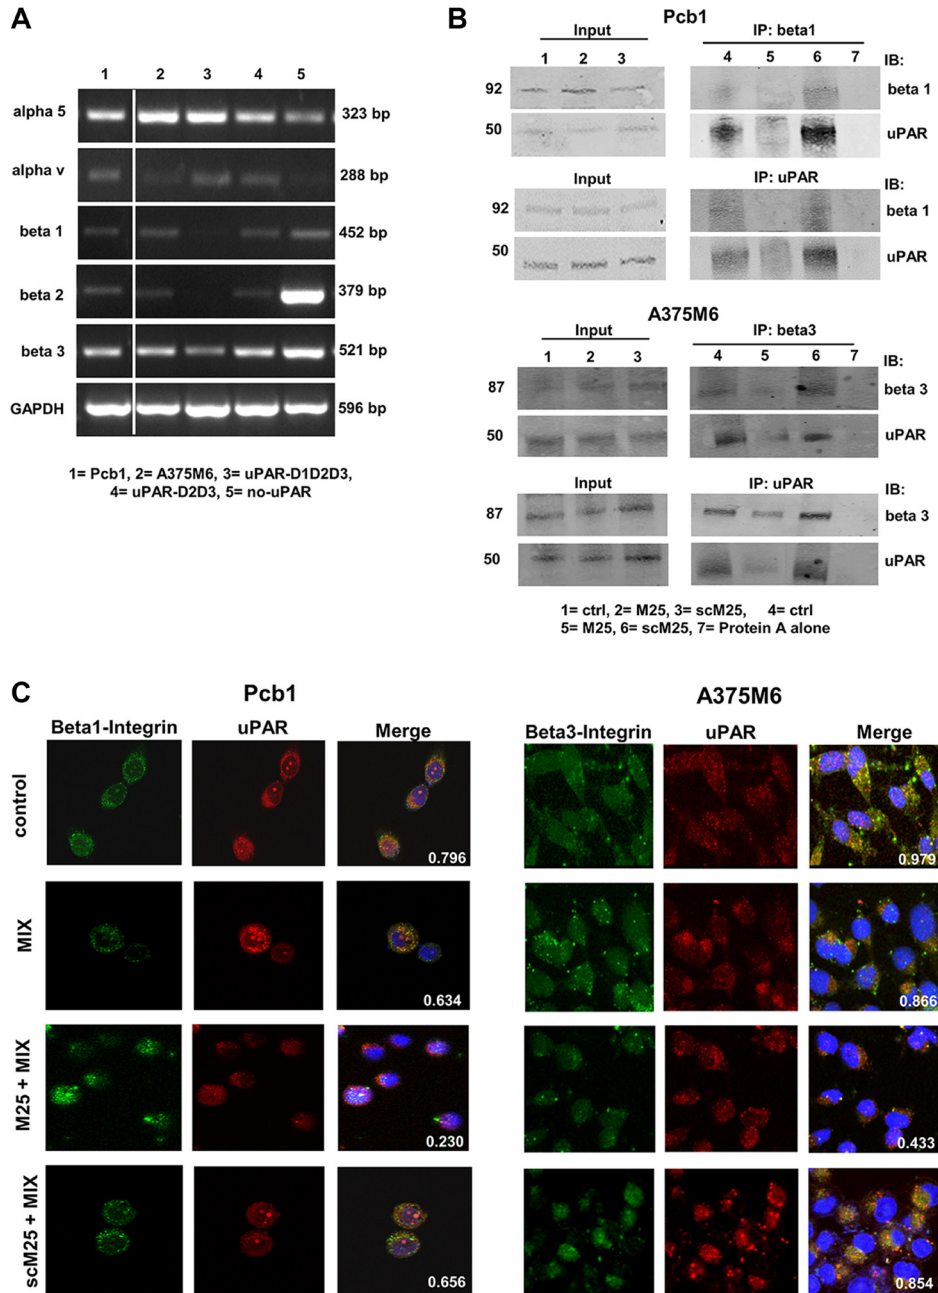

**Figure 6: Integrin pattern and integrin-uPAR interaction.** (A) Semiquantitative RT-PCR of the shown integrin  $\alpha$  and  $\beta$  chains in the cell lines used in this study. GAPDH was used as a reference control. Products size, expressed in bp, are reported on the right. (B) Immunoprecipitation of uPAR and  $\beta$ 1-integrins in Pcb1 prostate carcinoma cells and of uPAR and  $\beta$ 3-integrins in A375M6 melanoma cells. Input: Western blotting of aliquots of cell lysates before immunoprecipitation, used as a reference loading control. IP beta 1: immunoprecipitate obtained with anti-beta 1 antibodies; IB beta 1: immunoblotting with anti-beta 1 antibodies; IP beta 3: immunoprecipitate obtained with anti-beta 3 antibodies; IB beta 3: immunoblotting with anti-beta 3 antibodies; IB uPAR: immunoblotting with anti-uPAR antibody; IP uPAR: immunoprecipitate obtained with anti-uPAR antibodies. Molecular weights, expressed in kDa, are reported on the left. (C) Confocal microscopy for uPAR (red fluorescence)- $\beta$ 1-integrins (green fluorescence) co-localization in Pcb1 prostate carcinoma cells and for uPAR (red fluorescence)- $\beta$ 3-integrins (green fluorescence) co-localization in A375M6 melanoma cells under mesenchymal (control) and amoeboid (+MIX) conditions, in the absence and in the presence of M25 peptide and of scramble M25 peptide (scM25). Nuclear staining: DAPI (blue). The co-localization score is reported within each picture. Refer also to Table 1 for a complete view of co-localization scores in all the examined cell lines. Magnification: 40X. The shown pictures are representative of 50 different pictures for each experimental condition that were studied by Image J analysis, as reported in the legend to Table 1.
